1 **TITLE:** Selection at the pathway level drives the evolution of gene-specific transcriptional noise

2

3 **AUTHORS:** Gustavo Valadares Barroso<sup>1</sup>; Natasa Puzovic<sup>1</sup> and Julien Y Dutheil<sup>1,2</sup>

4

5 **Affiliations:**

6 1) Max Planck Institute for Evolutionary Biology. Department of Evolutionary Genetics. August-

7 Thienemann-Straße 2 24306 Plön – GERMANY

8 2) ISEM – Institut des Sciences de l’Évolution. UMR 5554, Université de Montpellier, Place

9 Eugène Bataillon 34095 Montpellier cedex 05 – FRANCE

10

11 **Corresponding Author:**

12 Gustavo V. Barroso, Max Planck Institute for Evolutionary Biology. Department of Evolutionary

13 Genetics. August-Thienemann-Straße 2, 24306 Plön – GERMANY.

# 14 **ABSTRACT:**

15 Biochemical reactions within individual cells result from the interactions of molecules, often in  
 16 small numbers. Consequently, the inherent stochasticity of binding and diffusion processes generate  
 17 noise along the cascade that leads to the synthesis of a protein from its encoding gene. As a result,  
 18 isogenic cell populations display phenotypic variability even in homogeneous environments. The  
 19 extent and consequences of this stochastic gene expression have only recently been assessed on a  
 20 genome-wide scale, in particular owing to the advent of single cell transcriptomics. However, the  
 21 evolutionary forces shaping this stochasticity have yet to be unraveled. We took advantage of two  
 22 recently published data sets of the single-cell transcriptome of the domestic mouse *Mus musculus* in  
 23 order to characterize the effect of natural selection on gene-specific transcriptional stochasticity. We  
 24 showed that noise levels in the mRNA distributions (*a.k.a.* transcriptional noise) significantly  
 25 correlate with three-dimensional nuclear domain organization, evolutionary constraint on the  
 26 encoded protein and gene age. The position of the encoded protein in biological pathways, however,  
 27 is the main factor that explains observed levels of transcriptional noise, in agreement with models of  
 28 noise propagation within gene networks. Because transcriptional noise is under widespread  
 29 selection, we argue that it constitutes an important component of the phenotype and that variance of  
 30 expression is a potential target of adaptation. Stochastic gene expression should therefore be  
 31 considered together with mean expression level in functional and evolutionary studies of gene  
 32 expression.

## 33 Introduction

34 Isogenic cell populations display phenotypic variability even in homogeneous environments  
 35 (Spudich and Koshland 1976). This observation challenged the clockwork view of the intra-cellular  
 36 molecular machinery and led to the recognition of the stochastic nature of gene expression. Because  
 37 biochemical reactions result from the interactions of individual molecules in small numbers  
 38 (Gillespie 1977), the inherent stochasticity of binding and diffusion processes generates noise along  
 39 the biochemical cascade leading to the synthesis of a protein from its encoding gene (**Figure 1**). The  
 40 study of stochastic gene expression (SGE) classically recognizes two sources of expression noise.  
 41 Following the definition introduced by Elowitz et al (Elowitz et al. 2002), extrinsic noise results  
 42 from variation in concentration, state and location of shared key molecules involved in the reaction  
 43 cascade from transcription initiation to protein folding. This is because molecules that are shared  
 44 among genes, such as ribosomes and RNA polymerases, are typically present in low copy numbers  
 45 relative to the number of genes actively transcribed (Shahrezaei and Swain 2008). Extrinsic factors  
 46 also include physical properties of the cell such as size and growth rate, likely to impact the  
 47 diffusion process of all molecular players. Extrinsic factors therefore affect every gene in a cell  
 48 equally. Conversely, intrinsic factors generate noise in a gene-specific manner. They involve, for  
 49 example, the strength of cis-regulatory elements (Suter et al. 2011) as well as the stability of the  
 50 mRNA molecules that are transcribed (McAdams and Arkin 1997; Thattai and Oudenaarden 2001).  
 51 Every gene is affected by both sources of stochasticity and the relative importance of each has been  
 52 discussed in the literature (Becskei et al. 2005; Raj and Oudenaarden 2008). Shahrezaei and Swain  
 53 (Shahrezaei and Swain 2008) proposed a more general, systemic and explicit definition for any  
 54 organization level, where intrinsic stochasticity is “generated by the dynamics of the system from  
 55 the random timing of individual reactions” and extrinsic stochasticity is “generated by the system  
 56 interacting with other stochastic systems in the cell or its environment”. This generic definition  
 57 therefore includes Raser and O’Shea’s (Raser and O’Shea 2005) suggestion to further distinguish  
 58 extrinsic noise occurring “within pathways” and “between pathways”. Other organization levels of  
 59 gene expression are also likely to affect expression noise, such as chromatin structure (Blake et al.  
 60 2003; Hebenstreit 2013), and three-dimensional genome organization (Pombo and Dillon 2015).  
 61 Pioneering work by Fraser et al (Fraser et al. 2004) has shown that SGE is an evolvable trait which  
 62 is subject to natural selection. First, genes involved in core functions of the cell are expected to  
 63 behave more deterministically (Barkai and Leibler 1999) because temporal oscillations in the  
 64 concentration of their encoded proteins are likely to have a deleterious effect. Second, genes  
 65 involved in immune response (Arkin et al. 1998; Norman et al. 2015) and response to  
 66 environmental conditions can benefit from being unpredictably expressed in the context of selection

67 for bet-hedging (Thattai and Oudenaarden 2004). As the relation between fitness and stochasticity  
68 depends on the function of the underlying gene, selection on SGE is expected to act mostly at the  
69 intrinsic level (Newman et al. 2006; Lehner 2008; Wang and Zhang 2011). The molecular  
70 mechanisms by which natural selection operates to regulate expression noise, however, remain to be  
71 elucidated.

72 Due to methodological limitations, seminal studies on SGE (both at the mRNA and protein levels)  
73 have focused on only a handful of genes (Elowitz et al. 2002; Ozbudak et al. 2002; Chubb et al.  
74 2006). The canonical approach consists in selecting genes of interest and recording the change of  
75 their noise levels in a population of clonal cells as a function of either (1) the concentration of the  
76 molecule that allosterically controls affinity of the transcription factor to the promoter region of the  
77 gene (Blake et al. 2003; Bar-even et al. 2006) or (2) mutations artificially imposed in regulatory  
78 sequences (Ozbudak et al. 2002). In parallel with theoretical work (Kepler and Elston 2001;  
79 Kaufmann and van Oudenaarden 2007; Sánchez and Kondev 2008), these pioneering studies have  
80 provided the basis of our current understanding of the proximate molecular mechanisms behind  
81 SGE, namely complex regulation by transcription factors, architecture of the upstream region  
82 (including the presence of TATA box), translation efficiency and mRNA / protein stability (Eldar  
83 and Elowitz 2010). Measurements at the genome scale are however needed in order to go beyond  
84 gene idiosyncrasies and particular histories, and test hypotheses about the evolutionary forces  
85 shaping SGE (Sauer et al. 2007).

86 The recent advent of single-cell RNA sequencing makes it possible to sequence the transcriptome of  
87 each individual cell in a collection of clones, and to observe the variation of gene-specific mRNA  
88 quantities across cells. This provides a genome-wide assessment of transcriptional noise. While not  
89 accounting for putative noise resulting from the process of translation of mRNAs into proteins,  
90 transcriptional noise accounts for noise generated by both synthesis and degradation of mRNA  
91 molecules (**Figure 1**). Previous studies, however, have shown that transcription is a limiting step in  
92 gene expression, and that transcriptional noise is therefore a good proxy for expression noise  
93 (Newman et al. 2006; Taniguchi et al. 2011). Here, we used publicly available single-cell  
94 transcriptomics data sets to quantify gene-specific transcriptional noise and relate it to other  
95 genomic factors, including protein conservation and position in the interaction network, in order to  
96 uncover the molecular basis of selection on stochastic gene expression.

## 97 Results

### 98 A new measure of noise to study genome-wide patterns of stochastic 99 gene expression

100 We used the dataset generated by Sasagawa et al (2013), which quantifies gene-specific amounts of  
101 mRNA as fragments per kilobase of transcripts per million mapped fragments (FPKM) values for  
102 each gene and each individual cell. Among these, we selected all genes in a subset containing 20  
103 embryonic stem cells in G1 phase in order to avoid recording variance that is due to different cell  
104 types or cell-cycle phases. The Quartz-Seq sequencing protocol captures every poly-A RNA present  
105 in the cell at one specific moment, allowing to assess transcriptional noise. Following Shalek et al  
106 (2014) we first filtered out genes that were not appreciably expressed in order to reduce the  
107 contribution of technical noise to the total noise. For each gene we further calculated the mean  $\mu$  in  
108 FPKM units and variance  $\sigma^2$  in FPKM<sup>2</sup> units, as well as two previously published measures of  
109 stochasticity: the *Fano factor*, usually referred to as the bursty parameter, defined as  $\sigma^2/\mu$  and  
110 *Noise*, defined as the coefficient of variation squared ( $\sigma^2/\mu^2$ ). Both the variance and *Fano factor*  
111 are monotonically increasing functions of the mean (**Figure 2A**). *Noise* is inversely proportional to  
112 mean expression (**Figure 2A**), in agreement with previous observations at the protein level (Bar-  
113 even et al. 2006; Taniguchi et al. 2011). While this negative correlation was theoretically predicted  
114 (Tao et al. 2007), it may confound the analyses of transcriptional noise at the genome level, because  
115 mean gene expression is under specific selective pressure (Pál et al. 2001). In order to disentangle  
116 these effects, we developed a new quantitative measure of noise, independent of the mean  
117 expression level of each gene. To achieve this we fitted a linear model in the log-space plot of  
118 variance *versus* mean and extracted the slope (a) and intercept (b) of the regression line. We defined  
119  $F^*$  as  $\sigma^2/(a \cdot \mu^b)$  (see Material and Methods) that is, the ratio of the observed variance over the  
120 variance component predicted by the mean expression level. Genes with  $F^* < 1$  have a variance  
121 lower than expected according to their mean expression whereas genes with  $F^* > 1$  behave the  
122 opposite way (**Figure 2A**). This approach is similar in principle to the running median approach of  
123 Newmann et. al (Newman et al. 2006). As expected,  $F^*$  displays no significant correlation with the  
124 mean (Kendall's tau = -0.009, p-value = 0.106, **Figure 2B**). We therefore use  $F^*$  as a measure of  
125 SGE throughout this study.

## 126 **Stochastic gene expression correlates with the three-dimensional, but** 127 **not one-dimensional, structure of the genome**

128 We first sought to investigate whether genome organization significantly impacts the patterns of  
129 stochastic gene expression. We assessed whether genes in proximity along chromosomes display  
130 more similar amount of transcriptional noise than distant genes. We tested this hypothesis by  
131 computing the primary distance on the genome between each pair of genes, that is, the number of  
132 base pairs separating them on the chromosome, as well as the relative difference in their  
133 transcriptional noise (see Methods). We found no significant association between the two distances  
134 (Mantel tests, each chromosome tested independently). Contiguous genes in one dimension,  
135 however, have significantly more similar transcriptional noise than non-contiguous genes  
136 (permutation test,  $p$ -value  $< 1e-3$ , **Figure S1**). Using Hi-C data from mouse embryonic cells (Dixon  
137 et al. 2012), we report that genes in contact in three-dimensions have significantly more similar  
138 transcriptional noise than genes not in contact (permutation test,  $p$ -value  $< 1e-3$ , **Figure S1**). Most  
139 contiguous genes in one-dimension also appear to be close in three-dimensions and the effect of 3D  
140 contact is stronger than that of 1D contact. These results therefore suggest that the three-  
141 dimensional structure of the genome has a stronger impact on stochastic gene expression than the  
142 position of the genes along the chromosomes. We further note that while highly significant, the size  
143 of this effect is small, with a difference in relative expression of -1.12% (**Figure S1**).

## 144 **Transcription factors binding and histone methylation impact** 145 **stochastic gene expression**

146 The binding of transcription factors (TF) to promoter constitutes one notable source of  
147 transcriptional noise (**Figure 1**) (Blake et al. 2003; Newman et al. 2006). In eukaryotes, the  
148 accessibility of promoters is determined by the chromatin state, which is itself controlled by histone  
149 methylation. We assessed the extent to which transcriptional noise is linked to particular TFs and  
150 histone marks by using data from the Ensembl regulatory build (Zerbino et al. 2015), which  
151 provides data from experimental evidence of TF binding and methylation sites along the genome.  
152 First we contrasted the  $F^*$  values of genes with binding evidence for each annotated TF  
153 independently. Among 13 TF represented by at least 5 genes in our data set, we found that 4 of them  
154 significantly influence  $F^*$  after adjusting for a global false discovery rate of 5%: the transcription  
155 repressor CTFC (adjusted  $p$ -value = 0.0286), the transcription factor CP2-like 1 (Tcfcp2l1, adjusted  
156  $p$ -value = 0.0111), the X-Linked Zinc Finger Protein (Zfx, adjusted  $p$ -value = 0.0111) and the Myc  
157 transcription factor (MYC, adjusted  $p$ -value = 0.0111). Interestingly, association with each of these  
158 four TFs led to an increase in transcriptional noise. We also report a weak but significant positive

correlation between the number of transcription factors associated with each gene and the amount of transcriptional noise (Kendall's tau = 0.023, p-value = 0.0009). This observation is consistent with the idea that noise generated by each TF is cumulative (Sharon et al. 2014). We then tested if particular histone marks are associated with transcriptional noise. Among five histone marks represented in our data set, three were found to be highly significantly associated to a higher transcriptional noise: H3K4me3 (adjusted p-value = 3.032e-162), H3K4me2 (adjusted p-value = 1.01e-129) and H3K27me3 (adjusted p-value = 7.418e-33). Methylation on the fourth Lysine of histone H3 is associated with gene activation in humans, while tri-methylation on lysine 27 is usually associated with gene repression (Barski et al. 2007). These results suggest that both gene activation and silencing contribute to the stochasticity of gene expression, in agreement with the view that bursty transcription leads to increased noise (Blake et al. 2003; Newman et al. 2006).

## Low noise genes are enriched for housekeeping functions

We investigated the function of genes at both ends of the  $F^*$  spectrum. We defined as candidate gene sets the top 10% least noisy or the top 10% most noisy genes in our data set, and tested for enrichment of GO terms and Reactome pathways (see Methods). It is expected that genes encoding proteins participating in housekeeping pathways are less noisy because fluctuations in concentration of their products might have stronger deleterious effects (Pedraza and van Oudenaarden 2005). On the other hand, stochastic gene expression could be selectively advantageous for genes involved in immune and stress response, as part of a bet-hedging strategy (eg Arkin et al. 1998; Shalek et al. 2013). While we do not find any significantly enriched Reactome pathway in the high noise gene set, a total of 37 pathways were significantly over-represented in the low-noise gene set (false discovery rate set to 1%). Interestingly, the top most significant pathways belong to modules related to translation (initiation, elongation, termination as well as ribosomal assembly), as well as several modules relating to gene expression, including chromatin regulation and mRNA splicing (**Figure 3**). GO terms enrichment tests lead to similar results (**Table 1**): we found the molecular functions “nucleic acid binding” and “structural constituent of ribosome”, the biological processes “nucleosome assembly”, “innate immune response in mucosa” and “translation”, as well as the cellular component “nuclear nucleosome” to be enriched in the low noise gene set. All these terms but one relate to gene expression.

The lack of significantly enriched Reactome pathways by high noise genes can potentially be explained by the nature of the data set: as the original experiment was based on unstimulated cells, genes that directly benefit from high SGE might not be expressed in these experimental conditions. In accordance, high-noise genes are not found to be enriched for any GO term.



## 192 **Highly connected proteins are synthesized by low-noise genes**

193 The structure of the interaction network of proteins inside the cell can greatly impact the  
 194 evolutionary dynamics of genes (Jeong et al. 2000; Barabási and Oltvai 2004). Furthermore, the  
 195 contribution of each constitutive node within a given network varies. This asymmetry is largely  
 196 reflected in the power-law-like degree distribution that is observed in virtually all biological  
 197 networks (Barabási and Albert 1999) with a few genes displaying a lot of connections and a  
 198 majority of genes displaying only a few. The individual characteristics of each node in a network  
 199 can be characterized by various measures of centrality (Newmann 2003). Following previous  
 200 studies on protein evolutionary rate (Fraser et al. 2002; Hahn et al. 2004; Jovelín and Phillips 2009)  
 201 we asked whether, at the gene level, there is a link between centrality of a protein and the amount of  
 202 transcriptional noise as measured by  $F^*$ , using five centrality metrics measured from the pathway  
 203 data available in the Reactome database (Croft et al. 2014). Our data set encompasses 13,660 genes  
 204 for which both gene expression data and pathway annotations were available.

205 We first estimated the pleiotropy index of each gene by counting how many different pathways the  
 206 corresponding proteins are involved in. We then computed centrality measures as averages over all  
 207 pathways in which each gene is involved. These measures include (1) *node degree* (here simply  
 208 referred to as “degree”), which corresponds to the number of other nodes a given node is directly  
 209 connected with, (2) *hub score*, which estimates the extent to which a node links to other central  
 210 nodes, (3) *authority score*, which estimates the importance of a node by assessing how many hubs  
 211 link to it, (4) *closeness*, a measure of the topological distance between a node and every other  
 212 reachable node (the fewer edge hops it takes for a protein to reach every other protein in a network,  
 213 the higher its closeness), and (5) *betweenness*, a measure of the frequency with which a protein  
 214 belongs to the shortest path between every pair of nodes.

215 A principal component analysis (PCA) revealed that these measures essentially fall in two groups  
 216 (**Figure S2**). The first component explained 43.4% of the total inertia, and represents measures  
 217 relating to the number of interacting partners of a given protein (degree 31.9%, hub score 32.8%,  
 218 authority score 33.6%). The second component, explaining 17.5% of the total inertia, represents the  
 219 other three variables (pleiotropy 41.3%, betweenness 15.7%, closeness 40.6%). The third axis  
 220 (17.2% of total inertia) represents only two variables (betweenness, 59.3% and closeness 38.4%),  
 221 while the fourth axis (15.3% of total inertia) represents in majority pleiotropy (54.8%).

222 Measures contributing to the first component of the PCA are all significantly negatively correlated  
 223 with transcriptional noise: the more central a protein is, the less transcriptional noise it displays  
 224 (**Table 2**). We also observed that pleiotropy is negatively correlated with  $F^*$  (**Table 2**), although to a  
 225 lesser extent suggesting that a protein that potentially performs multiple functions at the same time



needs to be less noisy. This effect is not an artifact of the fact that pleiotropic genes are themselves more central (e.g. correlation of pleiotropy and node degree: Kendall's tau = 0.229, p-value < 2.2e-16) or evolve more slowly (correlation of pleiotropy and Ka / Ks ratio: Kendall's tau = -0.11, p-value < 2.2e-16) since it is still significant after controlling for these variables (partial correlation of pleiotropy and F\*, accounting for centrality measures and Ka / Ks: Kendall's tau = -0.036, p-value = 3.695e-10). Closeness and betweenness, on the other hand, are highly correlated with each other but are independent of the degree measures (**Figure S2**), and do not significantly correlate with F\* (**Table 2**). In modular networks (Hartwell et al. 1999) nodes that connect different modules are extremely important to the cell (Guimera and Amaral 2005) and show high betweenness scores. In yeast, high betweenness proteins tend to be older and more essential (Joy et al. 2005), an observation also supported by our data set (betweenness vs gene age, Kendall's tau = 0.077, p-value = 7.569e-10; betweenness vs Ka/Ks, Kendall's tau = -0.077, p-value = 7.818e-12). It has been argued, however, that in protein-protein interaction networks high betweenness proteins are less essential due to the lack of directed information flow, compared to, for instance, regulatory networks (Yu et al. 2007), a hypothesis which could explain the lack of observed correlation. It was previously shown that centrality measures negatively correlates with evolutionary rate (Hahn and Kern 2004). Our results suggest that central genes are selectively constrained for their transcriptional noise, and that centrality therefore also influences the regulation of gene expression. Interestingly, it has been reported that central genes tend to be more duplicated (Vitkup et al. 2006). The authors proposed that such duplication events would have been favored as they would confer greater robustness to deleterious mutations in proteins. Our results are compatible with another, non exclusive, possible advantage: having more gene copies could reduce transcriptional noise by averaging the amount of transcripts produced by each gene copy (Raser and O'Shea 2005).

## 249 **Network structure impacts transcriptional noise of constitutive genes**

Whereas estimators of node centrality highlight gene-specific properties inside a given network, measures at the whole-network level enable the comparison of networks with distinct properties. We computed the size, diameter and transitivity for each annotated network in our data set (1,364 networks, Supplementary Material), as well as average measures of node scores (degree, hub score, authority score, closeness, betweenness) which we compare with the average F\* measure of all constitutive nodes. The size of a network is defined as its total number of nodes, while diameter is the length of the shortest path between the two most distant nodes. Transitivity is a measure of connectivity, defined as the average of all nodes' clustering coefficients, defined for each node as the proportion of its neighbors that also connect to each other. Interestingly, while network size is positively correlated with average degree and transitivity (Kendall's tau = 0.372, p-value < 2.2e-16

and Kendall's tau = 0.119, p-value = 2.807, respectively), diameter displays a positive correlation with average degree (Kendall's tau = 0.202, p-value < 2.2e-16) but a negative correlation with transitivity (Kendall's tau = -0.115, p-value = 2.237e-08). This is because diameter increases logarithmically with size, that is, addition of new nodes to large networks do not increase the diameter as much as additions to small networks. This suggests that larger networks are relatively more compact than smaller ones, and their constitutive nodes are therefore more connected. We find that average transcriptional noise correlates negatively with network size (Kendall's tau = -0.0594, p-value = 0.001376), while being independent of the diameter (Kendall's tau = 0.0125, p-value = 0.5366). Transcriptional noise is also strongly negatively correlated with all averaged centrality measures (**Table 3**). These results are in line with the node-based analyses, and show that the more connections a network has, the less stochastic the expression of the underlying genes is. This supports the view of Raser and O'Shea (Raser and O'Shea 2005) that the gene-extrinsic, pathway-intrinsic level is functionally pertinent and needs to be distinguished from the globally extrinsic level.

We further asked whether genes with similar transcriptional noise tend to synthesize proteins that connect to each other (positive assortativity) in a given network, or on the contrary, tend to avoid each other (negative assortativity). We considered all Reactome pathways annotated to the mouse and estimated their respective  $F^*$  assortativity. We found the mean assortativity to be significantly negative, with a value of -0.131 (one sample Wilcoxon rank test, p-value < 2.2e-16), meaning that proteins with different  $F^*$  values tend to connect with each other (**Figure S3**). Maslov & Sneppen (Maslov and Sneppen 2002) reported a negative assortativity between hubs in protein-protein interaction networks, which they hypothesized to be the result of selection for reduced vulnerability to deleterious perturbations. In our data set, however, we find the assortativity of hub scores to be slightly but significantly positive (average of 0.060, one sample Wilcoxon rank test, p-value = 0.0002702, **Figure S3**), although with a large distribution of assortativity values. As we showed that hub scores correlates negatively with  $F^*$  (**Table 2**), we asked whether the negative assortativity of hub proteins can at least partly explain the negative assortativity of  $F^*$ . We found a significantly positive correlation between the two assortativity measures (Kendall's tau = 0.338, p-value < 2.2e-16). The relationship between the measures, however, is not linear. A Multivariate Adaptive Regression Spline was fitted to the two assortativity measures and resulted in a selected model with a strong positive correlation for hub score assortativity below -0.16, and virtually no correlation above (**Figure S3**), suggesting a distinct relationship between hub score and  $F^*$  for negative and positive hub score assortativity. Negative assortativity of hub proteins contributes to a negative assortativity of SGE (Kendall's tau = 0.381, p-value < 2.2e-16), while for pathways with positive hub score assortativity the effect disappears (Kendall's tau = 0.052, p-value = 0.06282). While

assortativity of  $F^*$  is closer to 0 for pathways with positive assortativity of hub score, we note that it is still significantly negative (average = -0.047, one sample Wilcoxon test with p-value < 2.2e-16). This suggests the existence of additional constraints that act on the distribution of noisy proteins in a network.

## **Transcriptional noise is positively correlated with the evolutionary rate of proteins**

In the yeast *Saccharomyces cerevisiae*, evolutionary divergence between orthologous coding sequences correlates negatively with fitness effect on knock-out strains of the corresponding genes (Hirsh and Fraser 2001), demonstrating that protein functional importance is reflected in the strength of purifying selection acting on it. Fraser et al (Fraser et al. 2004) studied transcription and translation rates of yeast genes and classified genes in distinct noise categories according to their expression strategies. They reported that genes with high fitness effect display lower expression noise than the rest. Following these pioneering observations, we hypothesized that genes under strong purifying selection at the protein sequence level should also be highly constrained for their expression and therefore display a lower transcriptional noise. To test this hypothesis, we correlated  $F^*$  with the ratio of non-synonymous ( $K_a$ ) to synonymous substitutions ( $K_s$ ), as measured by sequence comparison between mouse genes and their human orthologs, after discarding genes with evidence for positive selection ( $n = 5$ ). In agreement with our prediction, we report a significantly positive correlation between the  $K_a / K_s$  ratio and  $F^*$  (**Figure 4**, Kendall's tau = 0.0619, p-value < 2.2e-16), that is, highly constrained genes display less transcriptional noise than fast evolving ones. This result demonstrates that genes encoding proteins under strong purifying selection are also more constrained on their transcriptional noise.

## **Older genes are less noisy**

Evolution of new genes was long thought to occur via duplication and modification of existing genetic material (“evolutionary tinkering”, (Jacob 1977)). Evidence for *de novo* gene emergence is however becoming more and more common (Tautz and Domazet-Lošo 2011; Xie et al. 2012). *De novo* created genes undergo several optimization steps, including their integration into a regulatory network (Neme and Tautz 2013). We tested whether the historical process of incorporation of new genes into pathways impacts the evolution of transcriptional noise. We used the phylostratigraphic approach of Neme & Tautz (Neme and Tautz 2013), which categorizes genes into 20 strata, to compute gene age and tested for a correlation with  $F^*$ . As older genes tend to be more conserved (Wolf et al. 2009), more central (according to the preferential attachment model of network growth

(Jeong et al. 2000; Jeong et al. 2001)) and more pleiotropic, we controlled for these confounding factors (**Figure 4**, Kendall's tau = -0.041, p-value = 1.406e-15 ; partial correlation controlling for Ka / Ks ratio, centrality measures and pleiotropy level). These results suggest that older genes are more deterministically expressed while younger genes are more noisy. While we cannot rule out that functional constraints not fully accounted for by the Ka / Ks ratio or unavailable functional annotations could explain at least partially the correlation of gene age and transcriptional noise, we hypothesise that the observed correlation result from ancient genes having acquired more complex regulation schemes through time. Such schemes include for instance negative feedback loops, which have been shown to stabilize gene expression and reduce expression noise (Becskei and Serrano 2000; Thattai and Oudenaarden 2001).

## Position in the protein network is the main driver of transcriptional noise

In order to jointly assess the effect of network topology, epigenomic factors, Ka / Ks ratio and gene age, we modeled the patterns of transcriptional noise as a function of multiple predictive factors within the linear model framework. In order to avoid overfitting due to a large number of explanatory variables, and because some of these variables are intrinsically correlated and can lead to colinearity issues, we performed data reduction procedures prior to modeling. For network variables, we used as synthetic measures of node centrality the first four principal components of the principal component analysis (PCA), explaining together 93% of the total inertia (**Figure S2**). As transcription factors and histone marks data are binary (presence / absence for each gene), we performed a logistic PCA for both type of variables (Landgraf and Lee 2015). For transcription factors, we selected the three first components, which explained 78% of deviance (**Figure S3**). The loads on the first component (PC1) are all negative, meaning that PC1 captures a global correlation trend and does not discriminate between TFs. The second component PC2 is dominated by TCFC (positive loading) and Oct4 (negative loading), while the third component PC3 is dominated by Esrrb (positive loading) and MYC, nMyc and E2F1 (negative loadings). For histone marks, the two first components explained 95% of variance and were therefore retained (**Figure S4**). PC1 is dominated by marks H3K27me3 and H3K9me3 linked to gene repression (negative loadings) and PC2 by marks H3K4me1 and H3K4me3 linked to gene activation (positive loadings). We fitted a linear model with  $F^*$  as a response variable, Ka / Ks ratio, gene age, the four synthetic network centrality measures, the three synthetic variables capturing the transcription factor binding evidences and the two synthetic variables capturing the presence of histone marks as explanatory variables. We also included the mean gene expression in order to account for spurious correlation of  $F^*$  with mean expression. We find that despite the intrinsic accounting of  $F^*$  for mean expression,

there is still a significant positive correlation with mean gene expression, which was not detected by Kendall's rank correlation test (see above). The corresponding coefficient, however, is very low (0.0003, **Table 4**). In agreement with our single variable analyses, we report that Ka / Ks ratio and gene age are significantly positively and negatively correlated with transcriptional noise, respectively (**Table 4**). We further find that the first component of the network PCA analysis has a significant positive effect on F\*. This measure essentially captures the effect of node degree, hub and transitivity scores (**Figure S2**); this result is therefore also consistent with single variable analyses. The second component of the logistic PCA of transcription factor binding evidence, as well as the first component of the logistic PCA on histone marks are also found to be significant (**Table 4**), which confirms the effect of these variables when other factors are accounted for. The coefficient associated with transcription factor PC2 is positive, which indicates that TFs increase transcriptional noise, in particular TCFC which has the highest loading on PC2. The coefficient associated with histone marks PC1, however is negative. Yet the largest loadings of the variables on this component are negative (H3K27me3 and H3K9me3), implying that these histones marks are associated with a higher transcriptional noise, as found by individual tests.

Altogether, the linear model with all variables explained 3.93% of the total variance. This small value indicates either that gene idiosyncrasies largely predominate over general effects, or that our estimates of transcriptional noise have a large measurement error, or both. An analysis of variance shows that the centrality variable explains the largest part of the variance (1.66% variance explained for the first synthetic variable, Fisher's test p-value = 9.552e-15 and 0.11% for the second synthetic variable, p-value = 0.0410). Mean gene expression only explained 0.11% of the total variance (Fisher's test p-value = 0.0386). Gene age only explains 0.31% of the variance (Fisher's test p-value = 1.432e-09) and functional constraints 1% (Ka / Ks variable, Fisher's test p-value = 0.0007). Transcription factors explain 0.19% of variance (Fisher's test p-value = 0.0079) and histone marks 0.48% (Fisher's test p-value = 2.665e-5). This suggests that, among all factors tested, position in protein network is the main driver of the evolution of gene-specific stochastic expression.

We further included the effect of three-dimensional organization of the genome in order to assess whether it could be a confounding factor. We developed a correlation model allowing for genes in contact to have correlated values of transcriptional noise. The correlation model was fitted together with the previous linear model in the generalized least square (GLS) framework. This model allows for one additional parameter,  $\lambda$ , which captures the strength of correlation due to three-dimensional organization of the genome (see Methods). The estimate of  $\lambda$  was found to be 0.0036, which means that the spatial autocorrelation of transcriptional noise is low on average. This estimate is significantly higher than zero, and model comparison using Akaike's information criterion favors the linear model with three-dimensional correlation, yet with very low support (AIC = 6403.452 vs.

396 AIC = 6403.859 for a linear model without three-dimensional correlation). Consistently, accounting  
397 for this correlation does not change significantly our estimates (**Table 4**), confirming network  
398 centrality measures as the main factor explaining the distribution of transcriptional noise.

## 399 **Analysis of bone marrow-derived dendritic cells supports the** 400 **generality of the results**

401 We assessed the reproducibility of our results by analyzing an additional single-cell transcriptomics  
402 data set of 95 unstimulated bone marrow-derived dendritic cells (BMDC) (Shalek et al. 2014). After  
403 filtering (see Methods), the data set consisted of 11,640 genes. Using the same normalization  
404 procedure as for the Sasagawa data set, we nonetheless report a weak but significant negative  
405 correlation between  $F^*$  and the mean expression ( $-0.068$ ,  $p\text{-value} < 2.2e-16$ ). We fitted a generalized  
406 linear model as for the embryonic stem cell (ESC) data set, with the exception that no epigenomic  
407 data was available for this cell type. Results of this model are very similar to the ones with the ESC  
408 data set: the model explains 3.24% of the variance, with 1.42% explained by network measures, and  
409 all effects are similar in direction and intensity (**Table S1**). When taking 3D genome correlations  
410 into account, we estimated a low correlation coefficient as for the ESC dataset ( $\lambda = 0.0025$ ),  
411 and the AIC favored the model without correlation. The mean gene expression is not found to be  
412 significant when taken together with other parameters in the BMDC data set. Interestingly, we find  
413 that the second and fourth principal components of the network analysis are also significant with  
414 this data set. We note that values of the “closeness” variable, which are for this dataset positively  
415 correlated with “betweenness” values, while they are negatively correlated for the ESC dataset.  
416 While these results support the generality of our observations, they also illustrate that in details, the  
417 structure of translational noise may vary in a cell type-specific manner.

## 418 **Biological, not technical noise is responsible for the observed patterns**

419 The variance in gene expression measured from single-cell transcriptomics is a combination of  
420 biological and technical variance. While the two sources of variance are a priori independent, gene-  
421 specific technical variance has been observed in micro-array experiments (Pozhitkov et al. 2007)  
422 making a correlation of the two types of variance plausible. If similar effects also affect RNA-Seq  
423 experiments, technical variance could be correlated to gene function and therefore act as a covariate  
424 in our analyses. In order to assess whether this is the case, we used the dataset of Shalek et al  
425 (Shalek et al. 2013), which contains both single-cell transcriptomics and 3 replicates of 10,000  
426 pooled-cell RNA sequencing. In traditional RNA sequencing, which is typically performed on  
427 pooled populations of several thousands of cells, biological variance is averaged out so that the



428 resulting measured variance between replicates is essentially the result of technical noise. We  
 429 computed the mean and variance in expression of each gene across the three populations of cells.  
 430 By plotting the variance versus the mean in log-space, we were able to compute a “technical”  $F^*$  (  
 431  $F_t^*$ ) value for each gene (Methods). We fitted linear models with and without 3D genome  
 432 correlation as for the single cell data, using  $F_t^*$  instead of  $F^*$ . We report that no variable but the  
 433 mean gene expression had a significant effect on  $F_t^*$ , yet with a very low size effect (**Table S2**).  
 434 In addition, there was no enrichment of the 10<sup>th</sup> and 90<sup>th</sup>  $F_t^*$  percentiles for any particular  
 435 pathway or GO term. These results therefore support our conclusion that the correlations we  
 436 observe are due to variations that are biological, not technical.

## 437 Discussion

438 Throughout this work, we provided the first genome-wide evolutionary and systemic study of  
 439 transcriptional noise, using mouse cells as a model. We have shown that transcriptional noise  
 440 correlates with functional constraints both at the level of the gene itself via the protein it encodes,  
 441 but also at the level of the pathway(s) the gene belongs to. We further discuss here potential  
 442 confounding factors in our analyses and argue that our results are compatible with selection acting  
 443 to reduce noise-propagation at the network level.

444 In this study, we exhibited several factors explaining the variation in transcriptional noise between  
 445 genes. While highly significant, the effects we report are of small size, and a complex model  
 446 accounting for all tested sources of variation only explains a few percent of the total observed  
 447 variance. There are several possible explanations for this reduced explanatory power: (1)  
 448 transcriptional noise is a proxy for noise in gene expression, at which selection occurs (**Figure 1**).  
 449 As transcriptional noise is not randomly distributed across the genome, it must constitute a  
 450 significant component of expression noise, in agreement with previous observations (Blake et al.  
 451 2003; Newman et al. 2006). Translational noise, however, might constitute an important part of the  
 452 expression noise and was not assessed in this study. (2) Gene expression levels were assessed on  
 453 embryonic stem cells in culture. Such an experimental system may result in gene expression that  
 454 differs from that in natural conditions under which natural selection acted. (3) Functional  
 455 annotations, in particular pathways and gene interactions are incomplete, and network-based  
 456 measures have most likely large false positive and negative error rates. (4) While the newly  
 457 introduced  $F^*$  measure allowed us to assess the distribution of transcriptional noise independently  
 458 of the average mean expression – therefore constituting an improvement over previous studies – it  
 459 does not capture the full complexity of SGE. Explicit modeling, for instance based in the Beta-



Poisson model (Vu et al. 2016) is a promising avenue for the development of more sophisticated quantitative measures.

In a pioneering study, Fraser et al, followed by Shalek et al, demonstrated that essential genes whose deletion is deleterious, and genes encoding subunits of molecular complexes (Fraser et al. 2004) as well as housekeeping genes (Shalek et al. 2013) display reduced gene expression noise. Our findings go beyond these early observations by providing a statistical assessment of the joint effect of multiple explanatory factors. Our analyses reveal that network centrality measures are the explanatory factors that explained the most significant part of the distribution of transcriptional noise in the genome. This suggests that selection at the pathway level is a widespread phenomenon that drives the evolution of SGE at the gene level. This multi-level selection mechanism, we propose, can be explained by selection against noise propagation within networks. It has been experimentally demonstrated that expression noise can be transmitted from one gene to another gene with which it is interacting (Pedraza and van Oudenaarden 2005). Large noise at the network level is deleterious (Barkai and Leibler 1999) but each gene does not contribute equally to it, thus the strength of selective pressure against noise varies among genes in a given network. We have shown that highly connected, “central” proteins typically display reduced transcriptional noise. Such nodes are likely to constitute key players in the flow of noise in intra-cellular networks as they are more likely to transmit noise to other components. In accordance with this hypothesis, we find genes with the lowest amount of transcriptional noise to be enriched for top-level functions, in particular involved in the regulation of other genes.

These results have several implications for the evolution of gene networks. First, this means that new connections in a network can potentially be deleterious if they link genes with highly stochastic expression. Second, distinct selective pressures at the “regulome” and “interactome” levels (**Figure 1**) might act in opposite direction. We expect genes encoding highly connected proteins to have more complex regulation schemes, in particular if their proteins are involved in several biological pathways. In accordance, several studies demonstrated that expression noise of a gene positively correlates with the number of transcription factors controlling its regulation (Sharon et al. 2014), a correlation that we also find significant in the data set analysed in this work. Central genes, while being under negative selection against stochastic behavior, are then more likely to be controlled by numerous transcription factors which increase transcriptional noise. As a consequence, if the number of connections at the interactome level is correlated with the number of connections at the regulome level, we predict the existence of a trade-off in the number of connections a gene can make in a network. Alternatively, highly connected genes might evolve regulatory mechanisms allowing them to uncouple these two levels: negative feedback loops, for instance, where the

product of a gene down-regulates its own production have been shown to stabilize expression and significantly reduce stochasticity (Becskei and Serrano 2000; Dublanche et al. 2006; Tao et al. 2007). We therefore predict that negative feedback loops are more likely to occur at genes that are more central in protein networks, as they will confer greater resilience against high SGE, which is advantageous for this class of genes.

Our results enabled the identification of possible selective pressures acting on the level of stochasticity in gene expression. The mechanisms by which the amount of stochasticity can be controlled remain however to be elucidated. We evoked the existence of negative feedback loops which reduce stochasticity and the multiplicity of upstream regulator which increase it. Recent work by Wolf et al (Wolf et al. 2015) and Metzger et al (Metzger et al. 2015) add further perspective to this scheme. Wolf and colleagues found that in *Escherichia coli* noise is higher for natural than experimentally evolved promoters selected for their mean expression level. They hypothesized that higher noise is selectively advantageous in case of changing environments. On the other hand, Metzger and colleagues performed mutagenesis experiments and found signature of selection for reduced noise in natural populations of *Saccharomyces cerevisiae*. These seemingly opposing results combined with our observations provide additional evidence that the amount of stochasticity in the expression of single genes has an optimum, as high values are deleterious because of noise propagation in the network, whilst lower values, which result in reduced phenotypic plasticity, are suboptimal in case of changing environment.

## Conclusion

Using a new measure of transcriptional noise, our results demonstrate that the position of the protein in the interactome is a major driver of selection against stochastic gene expression. As such, transcriptional noise is an essential component of the phenotype, in addition to the mean expression level and the actual sequence and structure of the encoded proteins. This is currently an under-appreciated phenomenon, and gene expression studies that focus only on the mean expression of genes may be missing key information about expression diversity. The study of gene expression must consider changes in noise in addition to change in mean expression level as a putative explanation for adaptation. Further work aiming to unravel the exact structure of the regulome is however needed in order to fully understand how transcriptional noise is generated or inhibited.

## 523 **Material and Methods**

### 524 **Single-cell gene expression data set**

525 We used the dataset generated by Sasagawa et al. (Sasagawa et al. 2013) retrieved from the Gene  
 526 Expression Omnibus repository (accession number GSE42268). We analyzed expression data  
 527 corresponding to embryonic stem cells in G1 phase, for which more individual cells were  
 528 sequenced. A total of 17,063 genes had non-zero expression in at least one of the 20 single cells.  
 529 Similar to Shalek et al (Shalek et al. 2014), a filtering procedure was performed where only genes  
 530 whose expression level satisfied  $\log(\text{FPKM}+1) > 1.5$  in at least one single cell were kept for further  
 531 analyses. This filtering step resulted in a total of 13,660 appreciably expressed genes for which  
 532 transcriptional noise was evaluated.

### 533 **Measure of transcriptional noise**

534 The expression mean ( $\mu$ ) and variance ( $\sigma^2$ ) of each gene over all single cells were  
 535 computed. A linear model was fitted on the log-transformed means and variances in order to  
 536 estimate the coefficients of the power law regression:

$$537 \quad \sigma^2 = a \cdot \mu^b \quad (\text{eqn 1})$$

$$538 \quad \log(\sigma^2) = \log(a) + b \cdot \log(\mu) \quad (\text{eqn 2})$$

539 We defined  $F^*$  as the ratio of the observed variance and the predicted variance:

$$540 \quad F^* = \frac{\sigma^2}{a \cdot \mu^b} \quad (\text{eqn 3})$$

541  $F^*$  can be seen as a general expression for the Fano factor ( $a = b = 1$ ) and noise measure ( $a = 1, b =$   
 542  $2$ ).  $F^*$  is the stochasticity measure unit with which we produced our results, after estimating the  $a$   
 543 and  $b$  parameters from the data.

### 544 **Genome architecture**

545 The mouse proteome from Ensembl (genome version: mm9) was used in order to get coordinates of  
 546 all genes. The Hi-C dataset for embryonic stem cells (ES) from Dixon et al (Dixon et al. 2012) was  
 547 used to get three-dimensional domain information. Two genes were considered in proximity in one  
 548 dimension (1D) if they are on the same chromosome and no protein-coding gene was found  
 549 between them. The primary distance (in number of nucleotides) between their midpoint coordinates  
 550 was also recorded as 1D a distance measure between the genes. Two genes were considered in  
 551 proximity in three dimensions (3D) if the normalized contact number between the two windows the  
 552 genes belong was non-null. Two genes belonging to the same window were considered in

proximity. We further computed the relative difference of stochastic gene expression between two genes by computing the ratio  $(F_2^* - F_1^*) / (F_2^* + F_1^*)$ . For each chromosome, we independently tested if there was a correlation between the primary distance and the relative difference in stochastic gene expression with a Mantel test, as implemented in the *ade4* package (Dray and Dufour, 2007). In order to test whether genes in proximity (1D and 3D) had more similar transcriptional noise than distant genes, we contrasted the relative differences in transcription noise between pairs of genes in proximity and pairs of distant genes. As we test all pairs of genes, we performed a randomization procedure in order to assess the significance of the observed differences by permuting the rows and columns in the proximity matrices 1,000 times. Linear models accounting for spatial interactions with genes were fitted using the generalized least squares (GLS) procedure as implemented in the “nlme” package for R (Pinheiro et al 2016). A correlation matrix between all tested genes was defined as  $G = \{g_{i,j}\}$ , where  $g_{i,j}$  is the correlation between genes *i* and *j*. We defined  $g_{i,j} = 1 - \exp(-\lambda \delta_{i,j})$ , where  $\delta_{i,j}$  takes 1 if genes *i* and *j* are in proximity, 0 otherwise. Parameter  $\lambda$  was estimated jointly with other model parameters, it measures the strength of the genome “spatial” correlation. Parameters were estimated using the maximum likelihood (ML) procedure, instead of the default restricted maximum likelihood (REML) in order to perform model comparison using Akaike’s information criterion (AIC).

## Transcription factors and histone marks

Transcription factor (TF) mapping data from the Ensembl regulatory build (Zerbino et al. 2015) were obtained via the *biomaRt* package for R. We used the Grch37 build as it contained data for stem cells epigenomes. Genes were considered to be associated with a given TF when at least one binding evidence was present in the 3 kb upstream flanking region. Transcription factors associated with less than 5 genes for which transcriptional noise could be computed were not considered further. A similar mapping was performed for histone marks by counting the evidence of histone modification in the 3 kb upstream and downstream regions of each gene. A logistic principal component analysis was conducted on the resulting binary contingency tables using the *logisticPCA* package for R (Landgraf and Lee 2015), for TF and histone marks separately. Principal components were used to define synthetic variables for further analyses.

## Biological pathways and network topology

The 13,660 Ensembl ids in our dataset were mapped to 13,136 Entrez ids. We kept only genes with unambiguous mapping, resulting in 11,032 Entrez ids for the Reactome pathway analysis. We defined genes either in the top 10% least noisy or in the top 10% most noisy as candidate sets and

585 used the Reactome PA package (Yu and He 2015) to search the mouse Reactome database for  
 586 overrepresented pathways with a 1% false discovery rate.  
 587 Thirteen thousand six hundred and sixty Ensembl ids mapped to a total of 29,859 UniProt ids. For  
 588 network analyses, we removed UniProt ids which were not annotated to the Reactome database,  
 589 resulting in a total of 4,929 UniProt ids after this first step. We then removed genes that mapped  
 590 ambiguously from Ensembl to UniProt, retaining 3,959 Ensembl / UniProt ids for which we  
 591 computed centrality measures. At the network level, size, transitivity and diameter could be  
 592 calculated for every pathway using a combination of three R packages (“pathview” (Luo 2013),  
 593 “igraph” (Csardi 2015) and “graphite” (Sales et al 2016)). As the calculation of assortativity does  
 594 not handle missing data (that is, nodes of the pathway for which no value could be computed), we  
 595 computed assortativity on the sub-network with nodes for which data were available. A principal  
 596 component analysis was conducted on all network centrality measures using the ade4 package for R  
 597 (Dray and Dufour 2007). Models of  $F^*$  assortativity measures were fitted and compared using  
 598 Multivariate Adaptive Regression Splines, as implemented in the “earth” package in R (Milborrow  
 599 2016).

## 600 **Gene Ontology Enrichment**

601 Eight thousand three hundreds and twenty five out of the 13,660 genes were associated with Gene  
 602 Ontology (GO) terms. We tested genes for GO terms enrichment at both ends of the  $F^*$  spectrum  
 603 using the same threshold percentile of 10% low / high noise genes as we did for the Reactome  
 604 analysis. We carried out GO enrichment analyses using two different algorithms: “Parent-child”  
 605 (Grossmann et al. 2007) and “Weight01”, a mixture of two algorithms developed by Alexa et al  
 606 (Alexa et al. 2006). We kept only the terms that appeared simultaneously on both Parent-child and  
 607 Weight01 under 10% significance level, controlling for multiple testing using the FDR method  
 608 (Benjamini and Hochberg 1995).

## 609 **Sequence divergence**

610 The Ensembl's Biomart interface was used to retrieve the proportion of non-synonymous ( $K_a$ ) and  
 611 synonymous ( $K_s$ ) divergence estimates for each mouse gene relative to the human ortholog. This  
 612 information was available for 13,136 genes.

## 613 **Gene Age**

614 The relative taxonomic ages of the mouse genes have been computed and is available in the form of  
 615 20 Phylostrata (Neme and Tautz 2013). Each Phylostratum corresponds to a node in the  
 616 phylogenetic tree of life. Phylostratum 1 corresponds to “All cellular organisms” whereas

Phylostratum 20 corresponds to “*Mus musculus*”, with other levels in between. We used this published information to assign each of our genes to a specific Phylostratum and used this as a relative measure of gene age: Age = 21 - Phylostratum, so that an age of 1 corresponds to genes specific to *M. musculus* and genes with an age of 20 are found in all cellular organisms.

## Linear modeling

We simultaneously assessed the effect of different factors on transcriptional noise by fitting linear models to the gene-specific  $F^*$  estimates. To avoid collinearity issues of intrinsically correlated explanatory variables, we used a principal component regression approach, using principal components analysis to reduce the number of input variables. We built a linear model with  $F^*$  as a response variable and the four first components of network centrality measures, three first components of TF binding variables, two first components of histone marks variables, as well as the  $K_a / K_s$  ratio and gene age. As the fitted model displayed significant departure to normality, it was further transformed using the Box-Cox procedure (“boxcox” function from the MASS package for R (Venables and Ripley 2002)). Residues of the selected model had independent residue distributions (Ljung-Box test, p-value = 0.1008) but still displayed significant departure to normality (Shapiro-Wilk test, p-value =  $1.751e-5$ ), and heteroscedasticity (Harrison-McCabe test, p-value = 0.00067). In order to assess whether these departures from the Gauss-Markov assumptions could bias our results, we used two complementary approaches. First we used the “robcov” function of the “rms” package in order to get robust estimates of the effect significance (Harrel 2016). Second, we performed a quantile regression using the “rq” function (parameter tau set to 0.5, equivalent to a median regression) of the “quantreg” package for R (Koenker, 2016). As quantile regression results were systematically consistent with linear regression analyses, we only report results from the latter.

## Additional data sets

The aforementioned analyses were additionally conducted on the data set of Shalek et al (Shalek et al. 2014). Following the filtering procedure established by the authors in the original paper, genes which did not satisfied the condition of being expressed by an amount such that  $\log(\text{TPM}+1) > 1$  in at least one of the 95 single cells were further discarded, where TPM stands for transcripts per million. This cut-off threshold resulted in 11,640 genes being kept for investigation. The rest of the analyses was conducted in the same way as in Sasagawa's data set.

## 647 **Data and program availability**

648 All datasets and scripts to reproduce the results of this study are available at Figshare, under the  
649 DOI 10.6084/m9.figshare.4587169.

650

## 651 **Authors contributions**

652 GVB and JYD designed the experiments and wrote the manuscript. GVB, NP and JYD conducted  
653 the analyses.

## 654 **Acknowledgements**

655 The authors would like to thank Rafiq Neme-Garrido, Frederic Bartels and Estelle Renaud for  
656 fruitful discussions about this work, Andrew Landgraf for help with the logistic PCA analysis as  
657 well as Diethard Tautz for comments on an earlier version of this manuscript. JYD acknowledges  
658 funding from the Max Planck Society. This work was supported by the German Research  
659 Foundation (DFG), within the priority program (SPP) 1590.

660

## 661 **References**

- Arkin A, Ross J, Mcadams HH. 1998. Stochastic Kinetic Analysis of Developmental Pathway Bifurcation in Phage L-Infected Escherichia coli Cells. *Genetics* 149:1633–1648.
- Barabási A-L, Albert R. 1999. Emergence of Scaling in Random Networks. *Science* 286:509–513.
- Barabási A-L, Oltvai ZN. 2004. Network biology: understanding the cell's functional organization. *Nature reviews. Genetics* 5:101–113.
- Bar-even A, Paulsson J, Maheshri N, Carmi M, Shea EO, Pilpel Y, Barkai N. 2006. Noise in protein expression scales with natural protein abundance. *Nature genetics* 38:636–643.
- Barkai N, Leibler S. 1999. Circadian clocks limited by noise. *Nature* 403:267–268.
- Barski A, Cuddapah S, Cui K, Roh T-Y, Schones DE, Wang Z, Wei G, Chepelev I, Zhao K. 2007. High-resolution profiling of histone methylations in the human genome. *Cell* 129:823–837.
- Becskei A, Kaufmann BB, van Oudenaarden A. 2005. Contributions of low molecule number and chromosomal positioning to stochastic gene expression. *Nature Genetics* 37:937–944.
- Becskei A, Serrano L. 2000. Engineering stability in gene networks by autoregulation. *Nature* 405:590–593.
- Blake WJ, Kærn M, Cantor CR, Collins JJ. 2003. Noise in eukaryotic gene expression. *Nature* 422:633–637.



- Chubb JR, Trcek T, Shenoy SM, Singer RH. 2006. Transcriptional Pulsing of a Developmental Gene. *Current Biology* 16:1018–1025.
- Dixon JR, Selvaraj S, Yue F, Kim A, Li Y, Shen Y, Hu M, Liu JS, Ren B. 2012. Topological domains in mammalian genomes identified by analysis of chromatin interactions. *Nature* 485:376–380.
- Dublanche Y, Michalodimitrakis K, Kümmerer N, Foglierini M, Serrano L. 2006. Noise in transcription negative feedback loops: simulation and experimental analysis. *Molecular systems biology* 2:41–41.
- Eldar A, Elowitz MB. 2010. Functional roles for noise in genetic circuits. *Nature* 467:167–173.
- Elowitz MB, Levine AJ, Siggia ED, Swain PS. 2002. Stochastic Gene Expression in a Single Cell. *Science* 297:1183–1186.
- Fraser HB, Hirsh AE, Giaever G, Kumm J, Eisen MB. 2004. Noise Minimization in Eukaryotic Gene Expression. *PLoS Biology* 2:0834–0838.
- Fraser HB, Hirsh AE, Steinmetz LM, Scharfe C, Feldman MW. 2002. Evolutionary Rate in the Protein Interaction Network. *Science* 296:750–752.
- Gillespie DT. 1977. Exact Simulation of Coupled Chemical Reactions. *The Journal of Physical Chemistry* 81:2340–2361.
- Guimera R, Amaral LAN. 2005. Functional cartography of complex metabolic networks. *Nature* 433:895–900.
- Hahn MW, Conant GC, Wagner A. 2004. Molecular Evolution in Large Genetic Networks: Does Connectivity Equal Constraint? *Journal of Molecular Evolution* 58:203–211.
- Hahn MW, Kern AD. 2004. Comparative Genomics of Centrality and Essentiality in Three Eukaryotic Protein-Interaction Networks. *Molecular Biology and Evolution* 22:7–10.
- Hartwell LH, Hopfield JJ, Leibler S, Murray AW. 1999. From molecular to modular cell biology. *Nature* 402:C47–C52.
- Hebenstreit D. 2013. Are gene loops the cause of transcriptional noise? *Trends in Genetics* 29:333–338.
- Hirsh A, Fraser H. 2001. Protein dispensability and rate of evolution. *Nature* 411:1046–1049.
- Jacob F. 1977. Evolution and Tinkering. *Science* 196:1161–1166.
- Jeong H, Mason SP, Barabási A L, Oltvai ZN. 2001. Lethality and centrality in protein networks. *Nature* 411:41–42.
- Jeong H, Tombor B, Albert R, Oltvai ZN, Barabási A-L. 2000. The large-scale organization of metabolic networks. *Nature* 407:651–654.
- Jovelín R, Phillips PC. 2009. Evolutionary rates and centrality in the yeast gene regulatory network. *Genome biology* 10:R35–R35.
- Joy MP, Brock A, Ingber DE, Huang S. 2005. High-betweenness proteins in the yeast protein interaction network. *Journal of Biomedicine and Biotechnology* 2005:96–103.

- Kaufmann BB, van Oudenaarden A. 2007. Stochastic gene expression: from single molecules to the proteome. *Current opinion in genetics & development* 17:107–112.
- Kepler TB, Elston TC. 2001. Stochasticity in Transcriptional Regulation : Origins, Consequences, and Mathematical Representations. *Biophysical Journal* 81:3116–3136.
- Kim PM, Lu LJ, Xia Y, Gerstein MB. 2013. Relating Three-Dimensional Structures to Protein Networks Provides Evolutionary Insights. *Science* 603:1938–1941.
- Landgraf AJ, Lee Y. 2015. Dimensionality Reduction for Binary Data through the Projection of Natural Parameters. arXiv:1510.06112 [stat] [Internet]. Available from: <http://arxiv.org/abs/1510.06112>
- Lehner B. 2008. Selection to minimise noise in living systems and its implications for the evolution of gene expression. *Molecular systems biology* 4:170–170.
- Maslov S, Sneppen K. 2002. Specificity and Stability in Topology of Protein Networks. *Science* 296:910–913.
- Mcadams HH, Arkin A. 1997. Stochastic mechanisms in gene expression. *Proceedings of the National Academy of Sciences of the United States of America* 94:814–819.
- Metzger BPH, Yuan DC, Gruber JD, Duvéau F, Wittkopp PJ. 2015. Selection on noise constrains variation in a eukaryotic promoter. *Nature* 521:344–347.
- Neme R, Tautz D. 2013. Phylogenetic patterns of emergence of new genes support a model of frequent de novo evolution. *BMC genomics* 14:117–117.
- Newman JRS, Ghaemmaghami S, Ihmels J, Breslow DK, Noble M, Derisi JL, Weissman JS. 2006. Single-cell proteomic analysis of *S. cerevisiae* reveals the architecture of biological noise. *Nature* 441:840–846.
- Norman TM, Lord ND, Paulsson J, Losick R. 2015. Stochastic Switching of Cell Fate in Microbes. *Annual review of microbiology* 69:381–403.
- Ozbudak EM, Thattai M, Kurtser I, Grossman AD, Oudenaarden AV. 2002. Regulation of noise in the expression of a single gene. *Nature genetics* 31:69–73.
- Pál C, Papp B, Hurst LD. 2001. Highly Expressed Genes in Yeast Evolve Slowly. *Genetics* 158:927–931.
- Pedraza JM, van Oudenaarden A. 2005. Noise propagation in gene networks. *Science* 307:1965–1969.
- Pombo A, Dillon N. 2015. Three-dimensional genome architecture: players and mechanisms. *Nature Reviews Molecular Cell Biology* 16:245–257.
- Pozhitkov, Alex E., Tautz D, Noble, Peter A. 2007. Oligonucleotide microarrays: widely applied, poorly understood. *BRIEFINGS IN FUNCTIONAL GENOMICS AND PROTEOMICS* 6:141–148.
- Raj A, Oudenaarden AV. 2008. Review Nature , Nurture , or Chance : Stochastic Gene Expression and Its Consequences. *Cell* 135:216–226.

- Raj A, Peskin CS, Tranchina D, Vargas DY, Tyagi S. 2006. Stochastic mRNA Synthesis in Mammalian Cells. *PLoS Biology* 4:e309–e309.
- Raser JM, O’Shea EK. 2005. Noise in Gene Expression: Origins, Consequences, and Control. *Science* 309.
- Sánchez A, Kondev J. 2008. Transcriptional control of noise in gene expression. *Proceedings of the National Academy of Sciences of the United States of America* 105:5081–5086.
- Sasagawa Y, Nikaido I, Hayashi T, Danno H, Uno KD, Imai T, Ueda HR. 2013. Quartz-Seq : a highly reproducible and sensitive single-cell RNA sequencing method , reveals non- genetic gene-expression heterogeneity. *Genome Biology* 14:R31–R31.
- Sauer U, Heineman M, Zamboni N. 2007. Getting Closer to the Whole Picture. *Science* 316:550–551.
- Shahrezaei V, Swain PS. 2008. The stochastic nature of biochemical networks. *Curr. Opin. Biotechnol.* 19:369–374.
- Shalek AK, Satija R, Adiconis X, Gertner RS, Gaublomme JT, Raychowdhury R, Schwartz S, Yosef N, Malboeuf C, Lu D, et al. 2013. Single-cell transcriptomics reveals bimodality in expression and splicing in immune cells. *Nature* 498:236–240.
- Shalek AK, Satija R, Shuga J, Trombetta JJ, Gennert D, Lu D, Chen P, Gertner RS, Gaublomme JT, Yosef N, et al. 2014. Single-cell RNA-seq reveals dynamic paracrine control of cellular variation. *Nature* 510:363–369.
- Sharon E, Van Dijk D, Kalma Y, Keren L, Manor O, Yakhini Z, Segal E. 2014. Probing the effect of promoters on noise in gene expression using thousands of designed sequences. *Genome Research* 24:1698–1706.
- So L, Ghosh A, Zong C, Sepúlveda LA, Segev R, Golding I. 2011. General properties of transcriptional time series in *Escherichia coli*. *Nature Genetics* 43:554–560.
- Spudich JL, Koshland DEJ. 1976. Non-genetic individuality: chance in the single cell. *Nature*:467–471.
- Suter DM, Molina N, Gatfield D, Schneider K, Schibler U, Naef F. 2011. Mammalian Genes Are Transcribed with Widely Different Bursting Kinetics. *Science* 332:472–474.
- Taniguchi Y, Choi PJ, Li G, Chen H, Babu M, Hearn J, Emili A, Xie XS. 2011. Quantifying *E. coli* Proteome and Transcriptome with Single-Molecule Sensitivity in Single Cells. *Science (New York, N.Y.)* 329:533–539.
- Tao Y, Zheng X, Sun Y. 2007. Effect of feedback regulation on stochastic gene expression. *J. Theor. Biol.* 247:827–836.
- Tautz D, Domazet-Lošo T. 2011. The evolutionary origin of orphan genes. *Nature reviews. Genetics* 12:692–702.
- Thattai M, Oudenaarden AV. 2001. Intrinsic noise in gene regulatory networks. *Proceedings of the National Academy of Sciences of the United States of America* 98:8614–8619.

- Thattai M, Oudenaarden AV. 2004. Stochastic Gene Expression in Fluctuating Environments. *Genetics* 167:523–530.
- Vitkup D, Kharchenko P, Wagner A. 2006. Influence of metabolic network structure and function on enzyme evolution. *Genome biology* 7:R39–R39.
- Vu TN, Wills QF, Kalari KR, Niu N, Wang L, Rantalainen M, Pawitan Y. 2016. Beta-Poisson model for single-cell RNA-seq data analyses. *Bioinformatics*:1–8.
- Wang Z, Zhang J. 2011. Impact of gene expression noise on organismal fitness and the efficacy of natural selection. *Proceedings of the National Academy of Sciences* 108:E67–E76.
- Wolf L, Silander OK, van Nimwegen EJ. 2015. Expression noise facilitates the evolution of gene regulation. *eLife* 4:1–48.
- Wolf YI, Novichkov PS, Karev GP, Koonin EV, Lipman DJ. 2009. The universal distribution of evolutionary rates of genes and distinct characteristics of eukaryotic genes of different apparent ages. *Proceedings of the National Academy of Sciences of the United States of America* 106:7273–7280.
- Xie C, Zhang YE, Chen JY, Liu CJ, Zhou WZ, Li Y, Zhang M, Zhang R, Wei L, Li CY. 2012. Hominoid-Specific De Novo Protein-Coding Genes Originating from Long Non-Coding RNAs. *PLoS Genetics* 8:e1002942.-e1002942.
- Yu H, Kim PM, Sprecher E, Trifonov V, Gerstein M. 2007. The importance of bottlenecks in protein networks: Correlation with gene essentiality and expression dynamics. *PLoS Computational Biology* 3:713–720.
- Zerbino DR, Wilder SP, Johnson N, Juettemann T, Flicek PR. 2015. The ensembl regulatory build. *Genome Biol.* 16:56.

## 662 Tables

663

664 Table 1: GO terms significantly enriched in the 10% genes with lowest transcriptional noise.

|     | Ontology | GO ID      | GO term                            | FDR Fisher<br>"parent-child" | FDR Fisher<br>"weight01" |
|-----|----------|------------|------------------------------------|------------------------------|--------------------------|
|     | MF       | GO:0003676 | nucleic acid binding               | 2.406E-03                    | 1.475E-08                |
|     | MF       | GO:0003735 | structural constituent of ribosome | 6.099E-03                    | 1.708E-05                |
|     | BP       | GO:0006334 | nucleosome assembly                | 3.816E-03                    | 1.380E-02                |
|     | BP       | GO:0002227 | innate immune response in mucosa   | 6.727E-03                    | 2.018E-02                |
|     | BP       | GO:0006412 | translation                        | 1.257E-02                    | 1.380E-02                |
| 665 | CC       | GO:0000788 | nuclear nucleosome                 | 3.493E-05                    | 2.587E-05                |

666 Note: FDR: False Discovery Rate. MF: Molecular Function. BP: Biological Process. CC: Cellular  
667 Compartment.

668

669 Table 2: Correlation of transcriptional noise with genes centrality measures and pleiotropy.

|     | Measure         | Correlation with F* | p-value   |
|-----|-----------------|---------------------|-----------|
|     | Degree          | -0.069              | 3.192E-10 |
|     | Hub score       | -0.068              | 6.132E-10 |
| 670 | Authority score | -0.064              | 6.151E-09 |
|     | Closeness       | -0.004              | 7.305E-01 |
|     | Betweenness     | -0.017              | 1.303E-01 |
|     | Pleiotropy      | -0.046              | 5.069E-05 |

671 Note: All correlations are computed using Kendall's rank correlation test.

Table 3: Correlation of average transcriptional noise with pathway centrality measures.

| Measure                 | Correlation with average F* | p-value   |
|-------------------------|-----------------------------|-----------|
| Size                    | -0.059                      | 1.376E-03 |
| Diameter                | 0.012                       | 5.366E-01 |
| Average degree          | -0.172                      | 8.944E-21 |
| Average hub score       | -0.188                      | 1.724E-24 |
| Average authority score | -0.166                      | 2.487E-19 |
| Average closeness       | 0.050                       | 6.500E-03 |
| Average betweenness     | -0.166                      | 2.487E-19 |
| Average pleiotropy      | -0.137                      | 1.276E-13 |

Note: All correlations are computed using Kendall's rank correlation test.

Table 4: Linear models of transcriptional noise with genomic and epigenomic factors.

|                 | OLS         |        |         | GLS         |        |         | Variance |
|-----------------|-------------|--------|---------|-------------|--------|---------|----------|
|                 | Coefficient | S.E.   | p-value | Coefficient | S.E.   | p-value |          |
| (Intercept)     | 0.5079      | 0.1130 | <0.0001 | 0.5128      | 0.1077 | <0.0001 |          |
| Mean expression | 0.0003      | 0.0001 | 0.0002  | 0.0003      | 0.0001 | 0.0001  | 0.12%    |
| Network PC1     | 0.0485      | 0.0066 | <0.0001 | -0.0482     | 0.0066 | <0.0001 | 1.66%    |
| Network PC2     | -0.0141     | 0.0103 | 0.1724  | -0.0141     | 0.0106 | 0.1867  | 0.11%    |
| Network PC3     | 0.0036      | 0.0096 | 0.7066  | 0.0034      | 0.0099 | 0.7340  | 0.00%    |
| Network PC4     | -0.0065     | 0.0104 | 0.531   | -0.0073     | 0.0108 | 0.5025  | 0.02%    |
| TF PC1          | 0.0029      | 0.0038 | 0.4524  | 0.0029      | 0.0035 | 0.4152  | 0.00%    |
| TF PC2          | 0.0064      | 0.0028 | 0.0206  | 0.0064      | 0.0027 | 0.0169  | 0.19%    |
| TF PC3          | 0.0009      | 0.0038 | 0.8155  | 0.0007      | 0.0037 | 0.8406  | 0.02%    |
| Histone PC1     | -0.0034     | 0.0009 | 0.0001  | -0.0034     | 0.0009 | 0.0001  | 0.48%    |
| Histone PC2     | 0.0003      | 0.0015 | 0.8325  | 0.0004      | 0.0012 | 0.7693  | 0.01%    |
| Ka / Ks         | -0.0209     | 0.0048 | <0.0001 | 0.3683      | 0.1083 | 0.0007  | 1.00%    |
| Age             | 0.3665      | 0.1027 | 0.0004  | -0.0211     | 0.0046 | <0.0001 | 0.31%    |

Note: OLS: Ordinary Least Squares. GLS: Generalized Least Squares. Network PC1-4: principal components of the principal component analysis (PCA) on network measures. TF PCA1-3: principal components of the logistic PCA on transcription factors binding evidences. Histone PC1-2: principal components of the logistic PCA on histone modification marks. S.E.: standard error.

## 682 **Figures**

683 Figure 1: A systemic view of gene expression.

684 Figure 2: Transcriptional noise and mean gene expression. A) Measures of noise plotted against the  
685 mean gene expression for each gene, in logarithmic scales together with corresponding regression  
686 lines: variance, Fano factor (variance / mean), noise (square of the coefficient of variation,  
687 variance / mean<sup>2</sup>) and F\* (this study). B) Distribution of F\* over all genes in this study. Vertical  
688 line corresponds to F\* = 1.

689 Figure 3: Enriched pathways in the 10% genes with lowest transcriptional noise.

690 Figure 4: Correlation of F\* with significant principal components of network centrality measures,  
691 transcription factors binding evidences and histone marks presence, as well as gene age and Ka / Ks  
692 ratio.

693

## 694 **Supplementary material:**

695 Table S1: Linear models of transcriptional noise with genomic factors for the bone marrow-derived  
696 dendritic cells data set. Legend as in Table 4.

697 Table S2: Linear models of transcriptional noise with genomic factors with pooled RNA-Seq data.  
698 Legend as in Table 4.

699 Figure S1: Impact of genome organization on the distribution of transcriptional noise. The x-axis  
700 shows the mean relative difference in transcriptional noise. Vertical lines show observed values and  
701 histograms the distribution over 1,000 permutations (see Methods). Left panel: distribution for  
702 neighbor genes along the genome. Right panel: distribution for genes in contact in three-  
703 dimensions.

704 Figure S2: Principal component analysis of network measures. A) Proportion of deviance explained  
705 by models with 1, 2, etc. principal components. B) Loadings of each variable on the 2 first  
706 components. C) Loadings of each variable on the 2<sup>nd</sup> and 3<sup>rd</sup> principal components.

707 Figure S3: Logistic principal component analysis of transcription factor binding evidences. A)  
708 Proportion of deviance explained by models with 1, 2, etc. principal components. B) Loadings of  
709 each variable on the 2 first components. C) Loadings of each variable on the 2<sup>nd</sup> and 3<sup>rd</sup> principal  
710 components.



711 Figure S4: Logistic principal component analysis of histone marks. A) Proportion of deviance  
712 explained by models with 1, 2, etc. principal components. B) Loadings of each variable on the 2  
713 first components.

714 Figure S5: Assortativity in networks. Assortativity for  $F^*$  and hub score are plotted against each  
715 other. Orange line: simple linear model. Blue line: “breakpoint” model. Vertical dashed line show  
716 the minimal value of hub score assortativity from which it has no effect on  $F^*$  assortativity.

Expression noise

Transcription noise

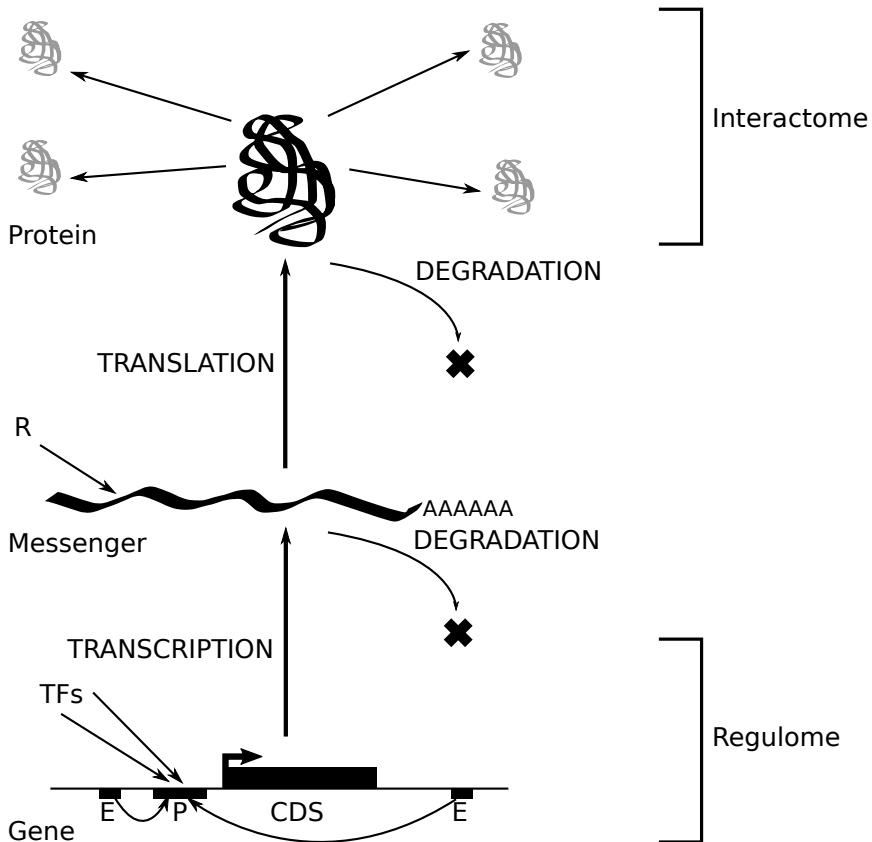

**A**

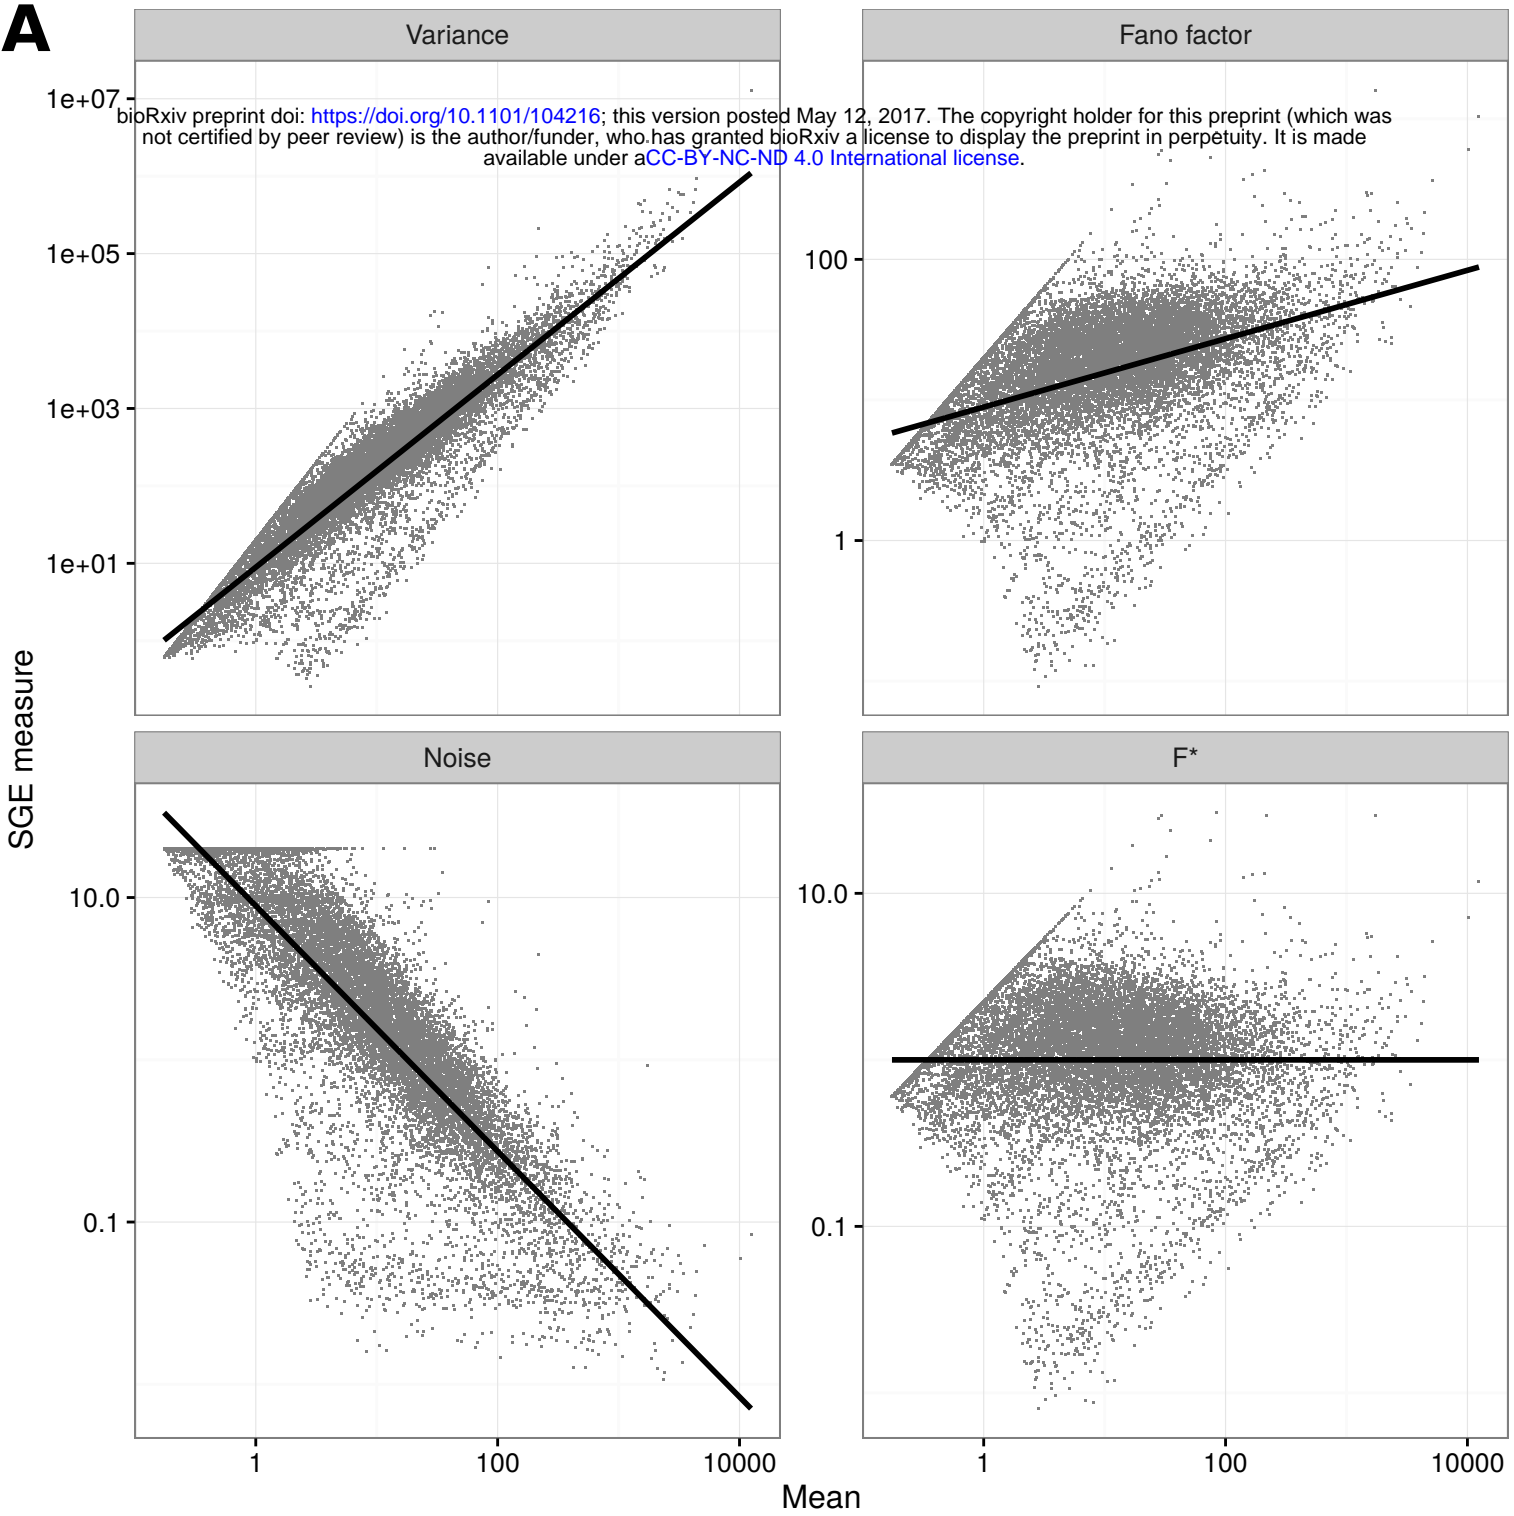

**B**

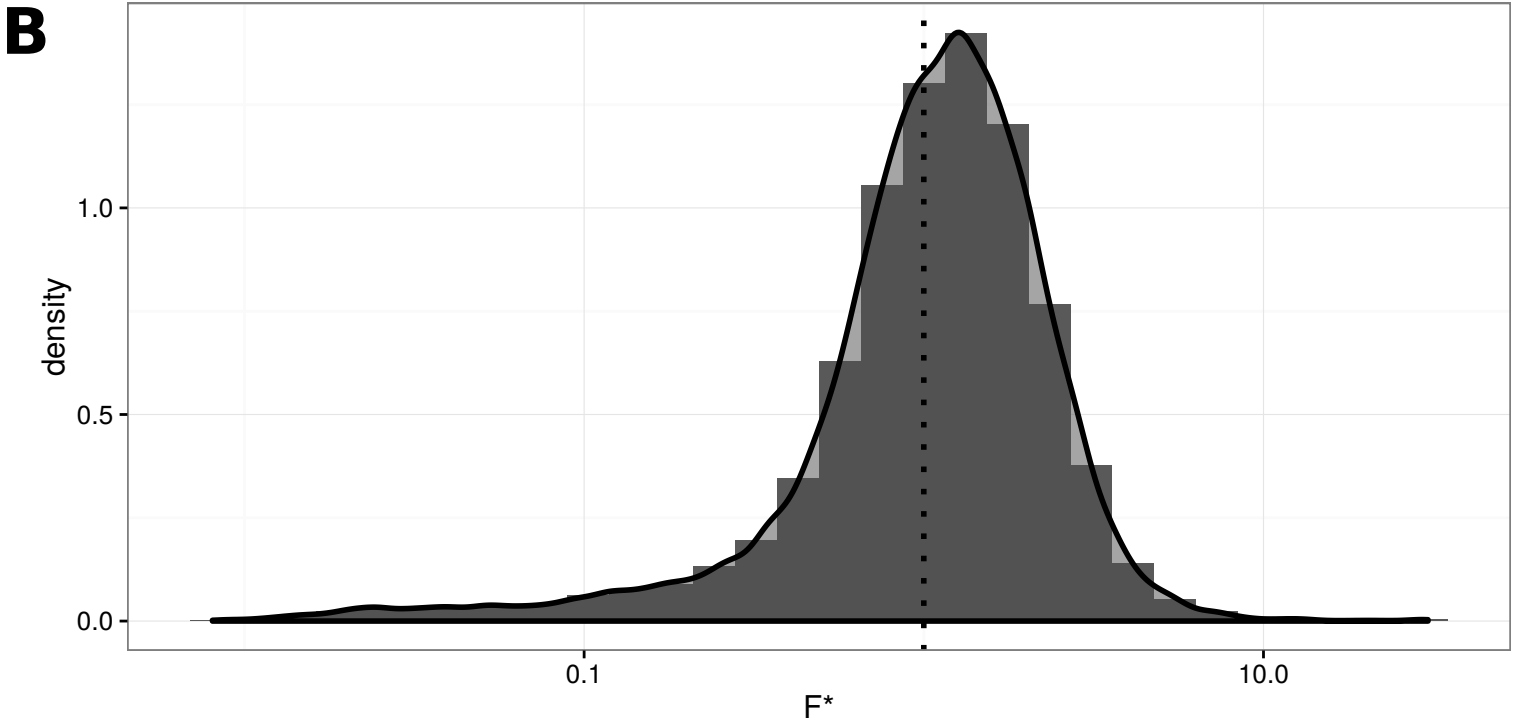

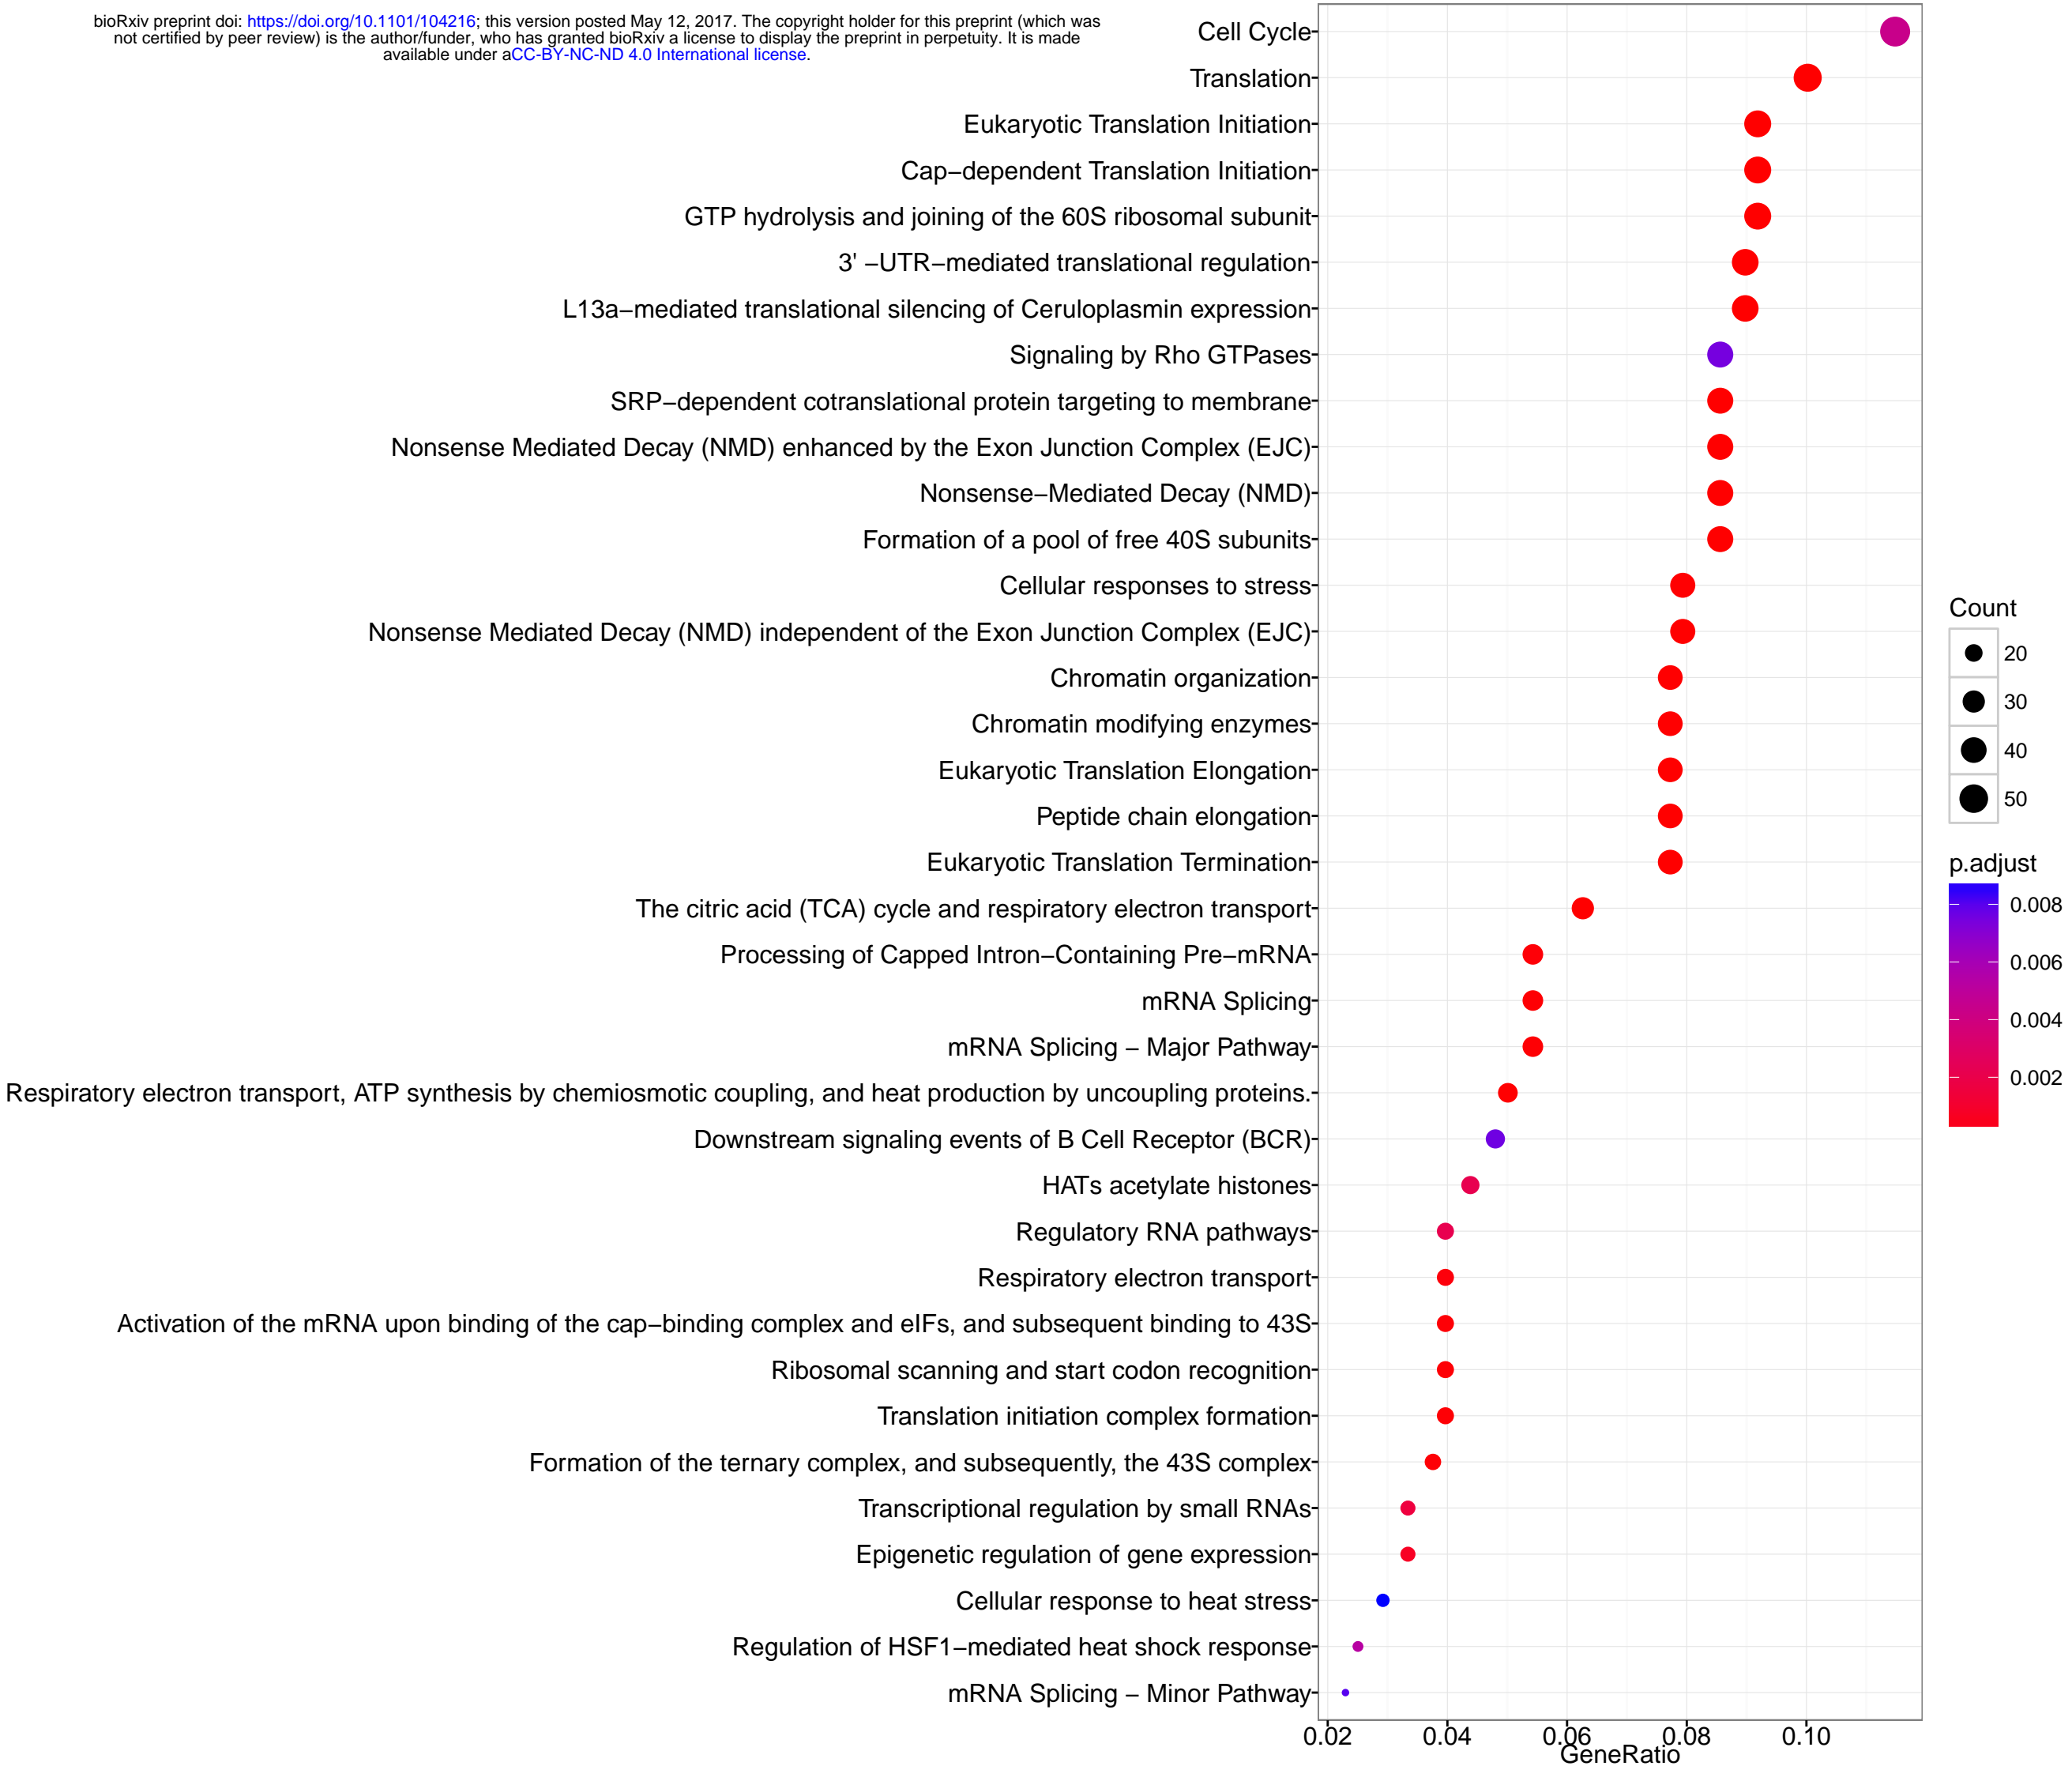

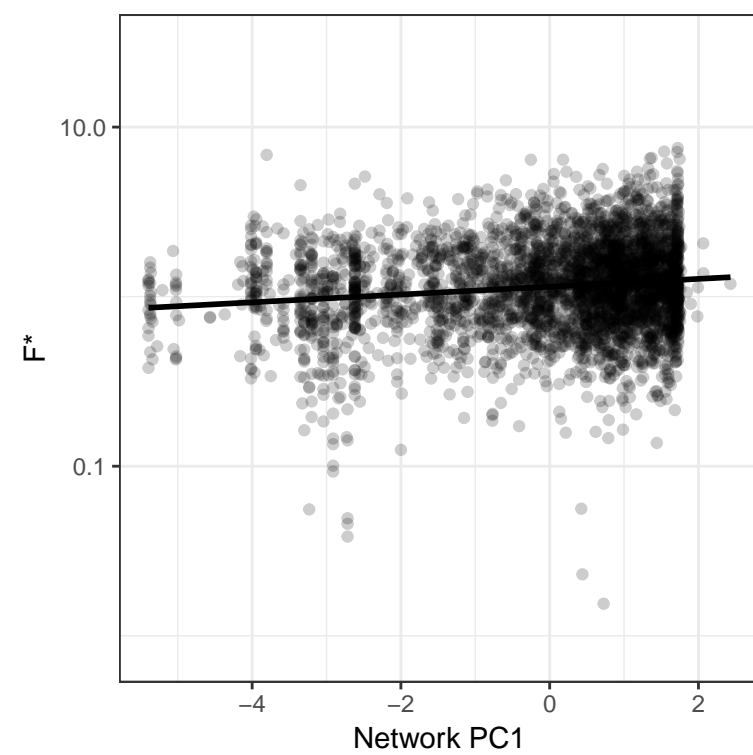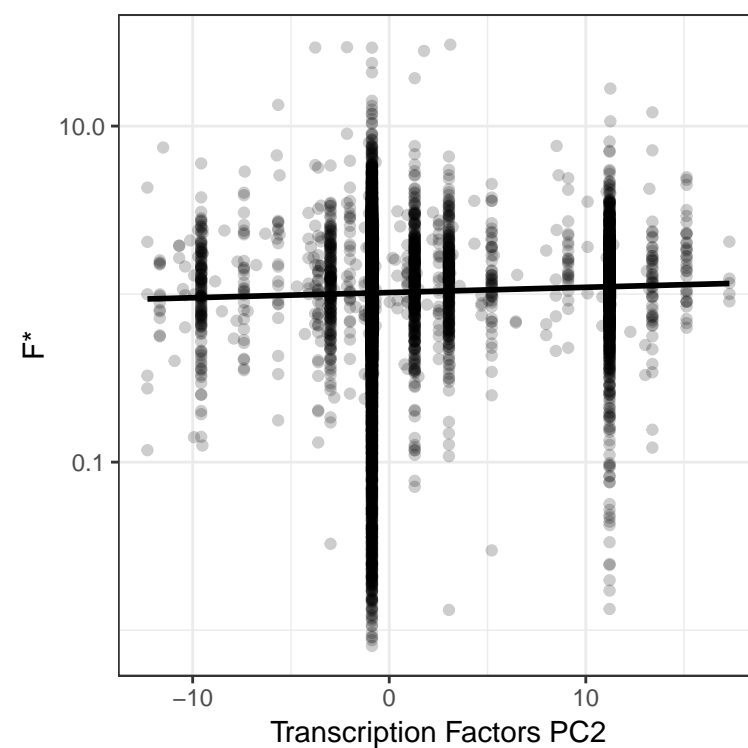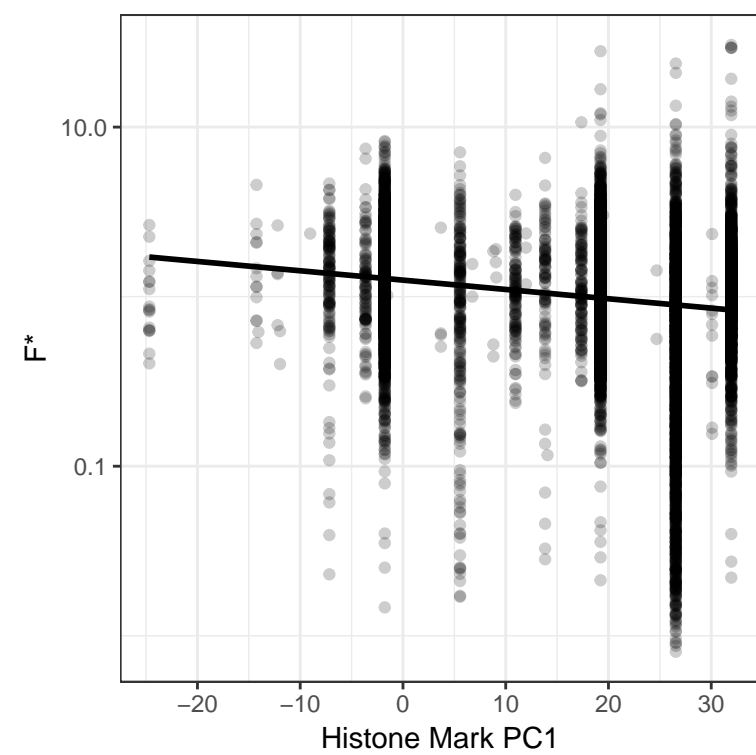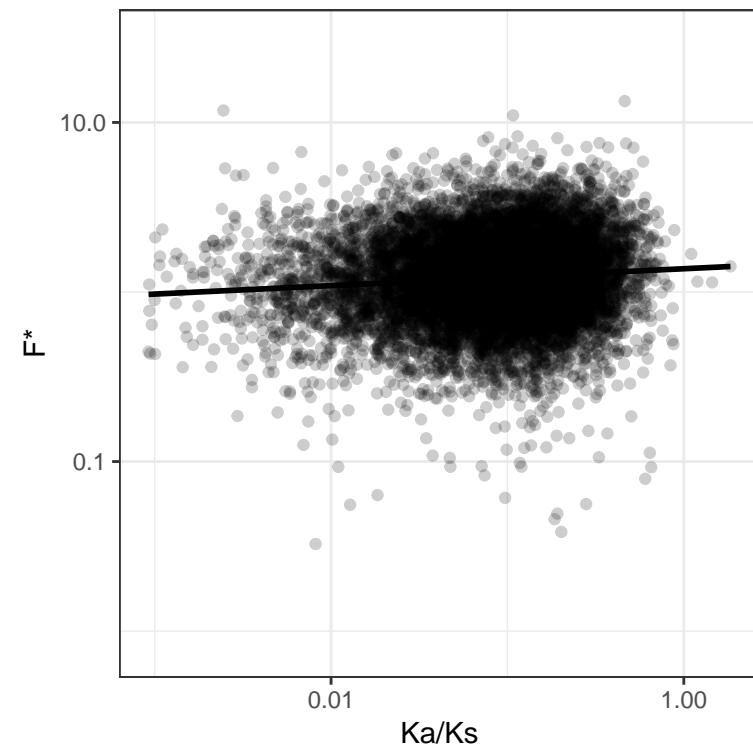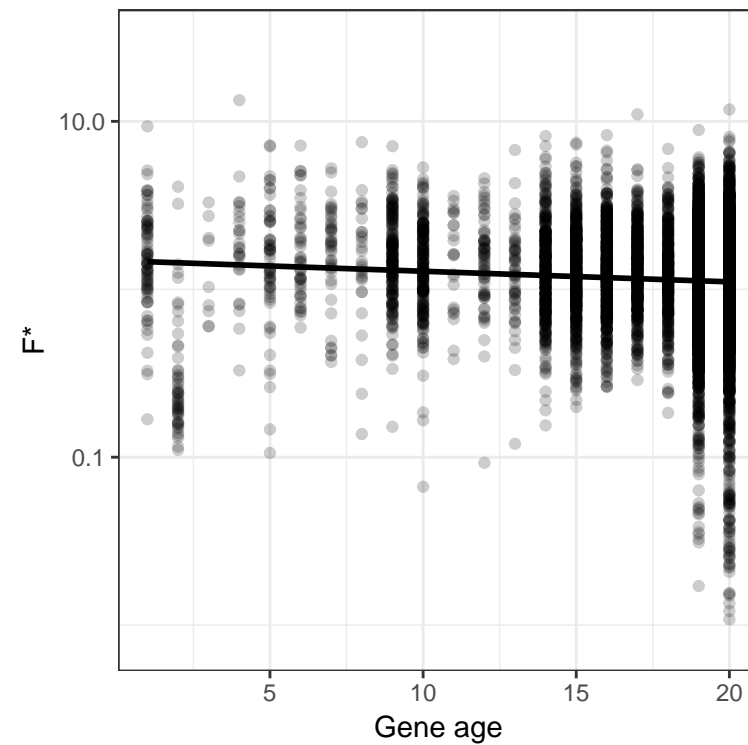

Source: https://www.biorxiv.org/content/10.1101/104216v4.full.pdf
